# Supplementary material
Source: PubMed Central journal article supplement (PMC5104910)
Supplement: 10.1074_M116.757062_jbc.M116.757062-1.pdf [file 10.1074_M116.757062_jbc.M116.757062-1.pdf]

1 **An isozyme-specific redox switch in human brain glycogen phosphorylase**  
2 **modulates its allosteric activation by AMP**

3  
4 Cécile Mathieu<sup>1</sup>, Romain Duval<sup>1</sup>, Angélique Cocaign<sup>1</sup>, Emile Petit<sup>1</sup>, Linh-Chi Bui<sup>1</sup>, Iman Haddad<sup>2</sup>,  
5 Joelle Vinh<sup>2</sup>, Catherine Etchebest<sup>3,4</sup>, Jean-Marie Dupret<sup>1,4</sup> and Fernando Rodrigues-Lima<sup>1,4\*</sup>

6  
7 Running title: Redox regulation of the human brain glycogen phosphorylase

8  
9 <sup>1</sup>Université Paris Diderot, Sorbonne Paris Cité, Unité BFA, CNRS UMR 8251, 75013 Paris, France

10 <sup>2</sup>ESPCI ParisTech, Université Paris Sciences et Lettres (PSL), Laboratoire de spectrométrie de masse  
11 biologique et protéomique, CNRS USR 3149, Paris, France

12 <sup>3</sup>INSERM, UMR S1134, Université Paris Diderot, F-75015 Paris, France; Université Paris Diderot,  
13 Sorbonne Paris Cité, Paris France; Institut National de la Transfusion Sanguine (INTS), Paris, France;  
14 GR-Ex, Laboratoire d'excellence, Paris France

15 <sup>4</sup>UFR Sciences du Vivant, Université Paris Diderot, 75013 Paris, France

16  
17 Corresponding author: Fernando Rodrigues-Lima

18 email: [fernando.rodrigues-lima@univ-paris-diderot.fr](mailto:fernando.rodrigues-lima@univ-paris-diderot.fr)

19  
20 **Keywords: glycogen, glycogen storage disease, brain metabolism, carbohydrate metabolism,**  
21 **redox regulation, disulfide, allosteric regulation**

## Supplementary Information

23  
24

### 25 **Supplementary Figure 1. Determination of the redox state of bGP cysteine residues by** 26 **differential labeling and mass spectrometry**

27 (a) Oxidized and reduced bGP were reduced by DTT following labelling of free cysteine residues by  
28 IAA, and then labelled using NEM. Proteins were then subjected to SDS-PAGE prior to extraction and  
29 trypsin digestion. Peptides were then separated on a capillary reverse phase column. Data for Cys318  
30 only are represented.

### 31 **Fragmentation of Cys318 and Cys326 labeled by IAA and NEM**

32 Peptides containing Cys318 and Cys326 were separated on a capillary reverse phase column prior to  
33 MS/MS analysis. Mass spectrum corresponding to peptides containing Cys318 (b and c) and Cys326  
34 (d and e) labeled by IAA and NEM respectively are presented.

35 (b) MS/MS spectra of the  $MH^{2+}$  ( $m/z$  503.75) CAM-alkylated peptide FGCRDPVR

36 (c) MS/MS spectra of the  $MH^{2+}$  ( $m/z$  537.76) NEM-alkylated peptide FGCRDPVR

37 (d) MS/MS spectra of the  $MH^{2+}$  ( $m/z$  572.75) CAM-alkylated peptide TCFETFPDK

38 (e) MS/MS spectra of the  $MH^{2+}$  ( $m/z$  572.75) NEM-alkylated peptide TCFETFPDK

39

### 40 **Supplementary Figure 2. Structural model of Cys318-Cys326 disulfide bond**

41 Ribbon representation of  $C_{\alpha}$  trace of the dimer of bGP. The AMP-binding site is marked by the  
42 allosteric effector AMP (surface representation) and is located at the dimer interface (left panel).  
43 AMP-binding site is composed of the Cap loop from one subunit and the helices 2 and 8 as well as the  
44 adenine loop from the other subunit. Under oxidative conditions, Cys318 and Cys326, which belong to  
45 the adenine loop, are oxidized to form a disulphide bond that avoid the AMP-dependent activation of  
46 bGP.

47

### 48 **Supplementary Figure 3. $C_{\alpha}$ -RMSF of loop residues for the wild-type and the structure with** 49 **disulfide bond\***

50 \*Calculation was made for each MD replicate. Upper panel: monomer A, lower panel: monomer B.

51 **Supplementary table 1. Distance separating the alpha carbons of each pair of Cysteine residues**

| $C\alpha_1/C\alpha_2$<br>(Å) | 109   | 143   | 318   | 326         | 373         | 436   | 445   | 496   | 581   | 757   | 784   | 808   |
|------------------------------|-------|-------|-------|-------------|-------------|-------|-------|-------|-------|-------|-------|-------|
| 109                          |       | 24,14 | 48,59 | 48,88       | 42,41       | 59,81 | 46,22 | 16,91 | 43,26 | 51,16 | 46,05 | 33,74 |
| 143                          | 24,14 |       | 37,33 | 34,35       | 21          | 39,02 | 23,36 | 14,08 | 31,4  | 40,32 | 32,53 | 19,45 |
| 318                          | 48,59 | 37,33 |       | <b>7,86</b> | 24,67       | 48,76 | 32,08 | 49,45 | 66,59 | 71,85 | 67,15 | 50,38 |
| 326                          | 48,88 | 34,35 | 7,86  |             | 18,57       | 41,11 | 25,17 | 47,49 | 61,71 | 66,23 | 62,8  | 47,83 |
| 373                          | 42,41 | 21    | 24,67 | 18,57       |             | 28,97 | 8,41  | 35,07 | 44,35 | 50    | 44,94 | 32,9  |
| 436                          | 59,81 | 39,02 | 48,76 | 41,11       | 28,97       |       | 21,17 | 49,5  | 41,82 | 38,79 | 48,06 | 49,42 |
| 445                          | 46,22 | 23,36 | 32,08 | 25,17       | <b>8,41</b> | 21,17 |       | 36,71 | 40,24 | 44,5  | 41,88 | 34,1  |
| 496                          | 16,91 | 14,08 | 49,45 | 47,49       | 35,07       | 49,5  | 36,71 |       | 28,04 | 38,69 | 29,37 | 19,5  |
| 581                          | 43,26 | 31,4  | 66,59 | 61,71       | 44,35       | 41,82 | 40,24 | 28,04 |       | 15,71 | 15,08 | 30,25 |
| 757                          | 51,16 | 40,32 | 71,85 | 66,23       | 50          | 38,79 | 44,5  | 38,69 | 15,71 |       | 30,12 | 44,47 |
| 784                          | 46,05 | 32,53 | 67,15 | 62,8        | 44,94       | 48,06 | 41,88 | 29,37 | 15,08 | 30,12 |       | 22,17 |
| 808                          | 33,74 | 19,45 | 50,38 | 47,83       | 32,9        | 49,42 | 34,1  | 19,5  | 30,25 | 44,47 | 22,17 |       |

52 The distance between C $\alpha$  from each pair of cysteine was measured using Chimera Software and reported. Distances are expressed in Å. The pairs of cysteine  
53 residues with a C $\alpha$  distance inferior to 10 Å were considered as close enough to be potentially involved in an intramolecular disulfide bond.

54 **Supplementary table 2. Identification of oxidized cysteines by differential labeling followed by mass spectrometry**

| Cysteine ID | Residues Start-End | Peptide Sequence                                     | m/z            | m/z           | Oxidized by H <sub>2</sub> O <sub>2</sub> |
|-------------|--------------------|------------------------------------------------------|----------------|---------------|-------------------------------------------|
|             |                    |                                                      | NEM            | CAM           |                                           |
| 109         | 95 - 139           | TLQNTMVNLGLQNA <b>C</b> DEAIYQLGLDLEEEIEEDAGLGNGGLGR | NI             | 1223,59       | nd                                        |
| 143         | 120 - 161          | LAA <b>C</b> FLDSMATLGLAAYGYGIR                      | 1201,6         | 778,725       | YES                                       |
| 318         | 317 - 324          | FG <b>C</b> RDVPVR                                   | NI             | 503,748       | YES                                       |
| 326         | 325 - 333          | TC <b>F</b> ETFPDK                                   | 606,765        | 572,753       | YES                                       |
| 373         | 371 - 387          | KT <b>C</b> AYTNHTVLPEALER                           | 691,013        | 1002          | YES                                       |
| 436         | 428 - 439          | RMSVIEEGD <b>C</b> K                                 | 696,317        | 662,305       | YES                                       |
| <b>445</b>  | <b>439 - 458</b>   | <b>RINMAHL<b>C</b>VIGSHAVNGVAR</b>                   | <b>561,547</b> | <b>544,54</b> | <b>NO</b>                                 |
| 496         | -                  | -                                                    | NI             | NI            | nd                                        |
| 581         | 577-590            | QLLNCLHVVTLYNR                                       | 905,986        | 871,972       | YES                                       |
| 757         | 741 - 754          | QAVDQISSGFFSPKEPD <b>C</b> FK                        | 1178,05        | 763,028       | YES                                       |
| 784         | 774 - 796          | VFADYEAYMQ <b>C</b> QAQVDQLYRPK                      | 969,113        | 946,438       | YES                                       |
| 808         | 805 - 823          | NI <b>A</b> CSGKFSSDR                                | 561,774        | 544,765       | nd                                        |

55 For each labeled peptide, m/z allowed the distinction between reduced (NEM) and oxidized (CAM) state (column m/z NEM for NEM labeling ; column "m/z  
56 CAM" for CAM labeling). Data were analyzed using Maxquant software. Relative quantification of NEM and CAM modified peptide are represented by  
57 NEM/CAM ratio in both reduced and oxidized condition. Decrease of NEM/CAM ratio between reduced and oxidized condition was considered as  
58 representative of the oxidation of the cysteine after treatment by H<sub>2</sub>O<sub>2</sub>.

59  
60

61 **Supplementary table 3. Contacts with AMP**

| Threshold (Å)                                                  | 3    |       | 4    |       | 4.5  |       | 5    |       | 5.5  |       | 6    |       |
|----------------------------------------------------------------|------|-------|------|-------|------|-------|------|-------|------|-------|------|-------|
|                                                                | SS   | No SS |
| <b>Average* Number of protein residues in contact with AMP</b> |      |       |      |       |      |       |      |       |      |       |      |       |
|                                                                | 21   | 21    | 27   | 26    | 32   | 30    | 38   | 34    | 45   | 41    | 53   | 51    |
| <b>Average* Frequency of AMP-Loop residues contacts</b>        |      |       |      |       |      |       |      |       |      |       |      |       |
| 1-contact                                                      | 1048 | 2348  | 1748 | 3580  | 1977 | 4014  | 2495 | 4279  | 3422 | 4084  | 4105 | 2972  |
| 2-contacts                                                     | 174  | 121   | 268  | 369   | 554  | 785   | 864  | 1624  | 1143 | 2859  | 1636 | 4040  |
| 3-contacts                                                     | 3    | 13    | 24   | 101   | 43   | 192   | 195  | 341   | 433  | 730   | 817  | 1596  |
| 4-contacts                                                     | 0    | 0     | 0    | 3     | 0    | 19    | 0    | 72    | 1    | 164   | 15   | 338   |

62 \* Average was calculated over the two monomers and the two MD replicates. The conformations were  
63 stored every 1ps, which corresponds to 100000 frames for 100ns.

64  
65 *Upper part:* Average number of protein residues having at least one atom below threshold distances  
66 from AMP simultaneously.

67 *Lower part:* Frequency of contacts made by loop residues (residues 314 to 334) calculated over the  
68 whole simulation (10000 frames). 1-contact means only one residue of the loop is contacting  
69 simultaneously, 2-contact means two residues of the loop are contacting AMP simultaneously, etc.

70 For example for a 6 Å threshold, two residues of the loops are contacting AMP molecule  
71 simultaneously roughly half of the time (4040 over 10000 frames) in the wild-type structure.

72

73 **Supplementary Table 4. Oligonucleotides used for site-directed mutagenesis**

| Mutation    | 5' primer                           | 3' primer                        |
|-------------|-------------------------------------|----------------------------------|
| Cys 318 Ser | TCCAAGTTCGGC a GCCGGGACCTGTGAGAA    | GGGTCCCGGC t GCCGAACCTGGACGACTTG |
| Cys 326 Ser | CCTGTGAGAACC a GTTTCGAGACGTCCCAGACA | ACGTCTCGAAAC t GGTTCACAGGGTCCCG  |

74 The cysteine residues were mutated into serine residues using primers containing the single point  
75 mutation to make. The lowercase base correspond to the mutated base.  
76
