# Supplementary material
Source: PubMed Central journal article supplement (PMC5104910)

# Supplementary Figure 1

a

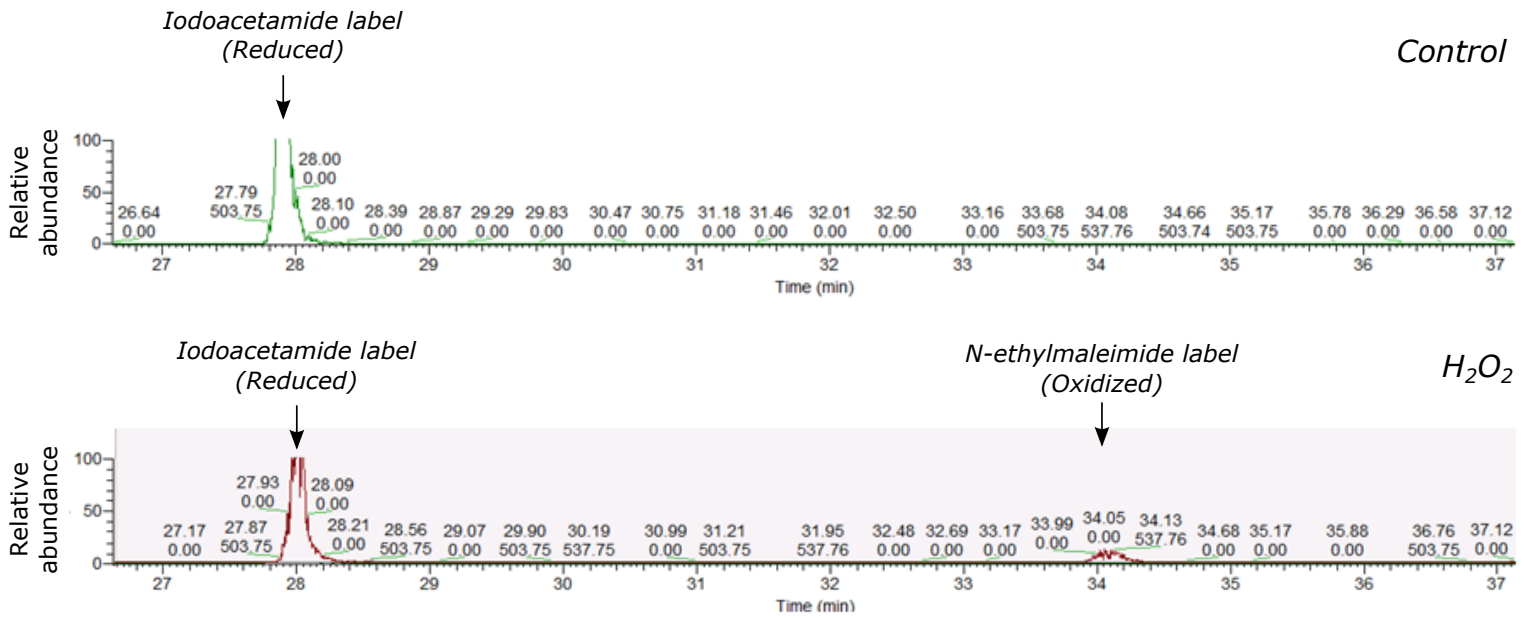

b

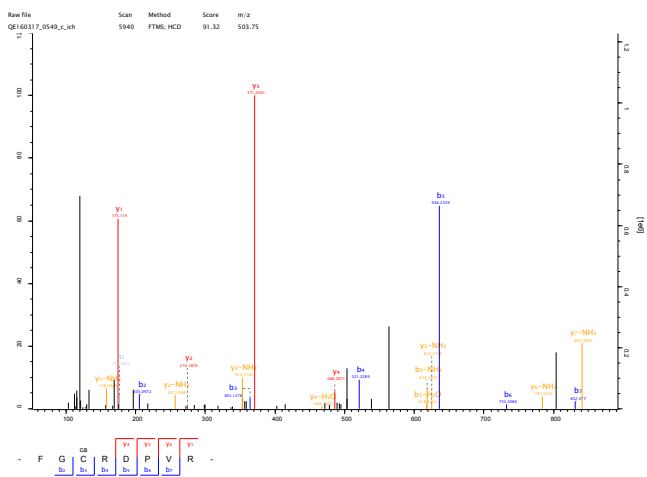

c

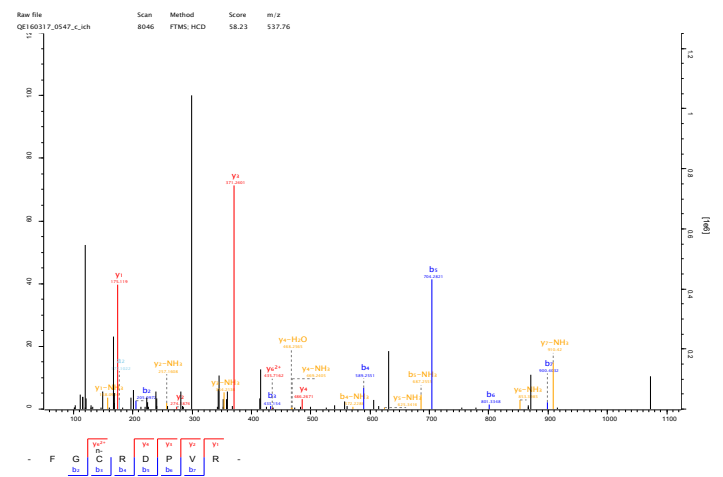

d

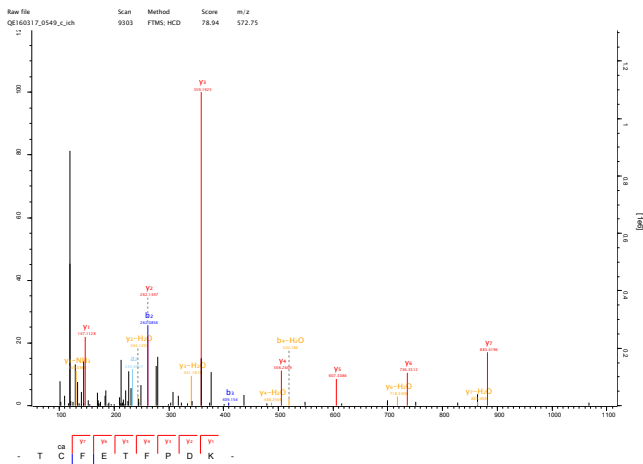

e

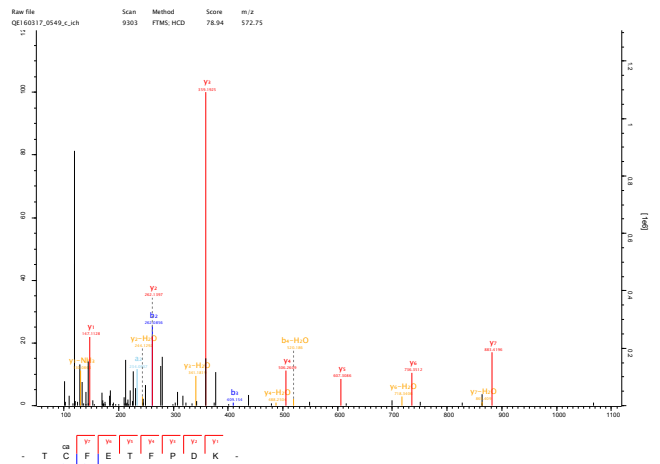

# Supplementary Figure 2

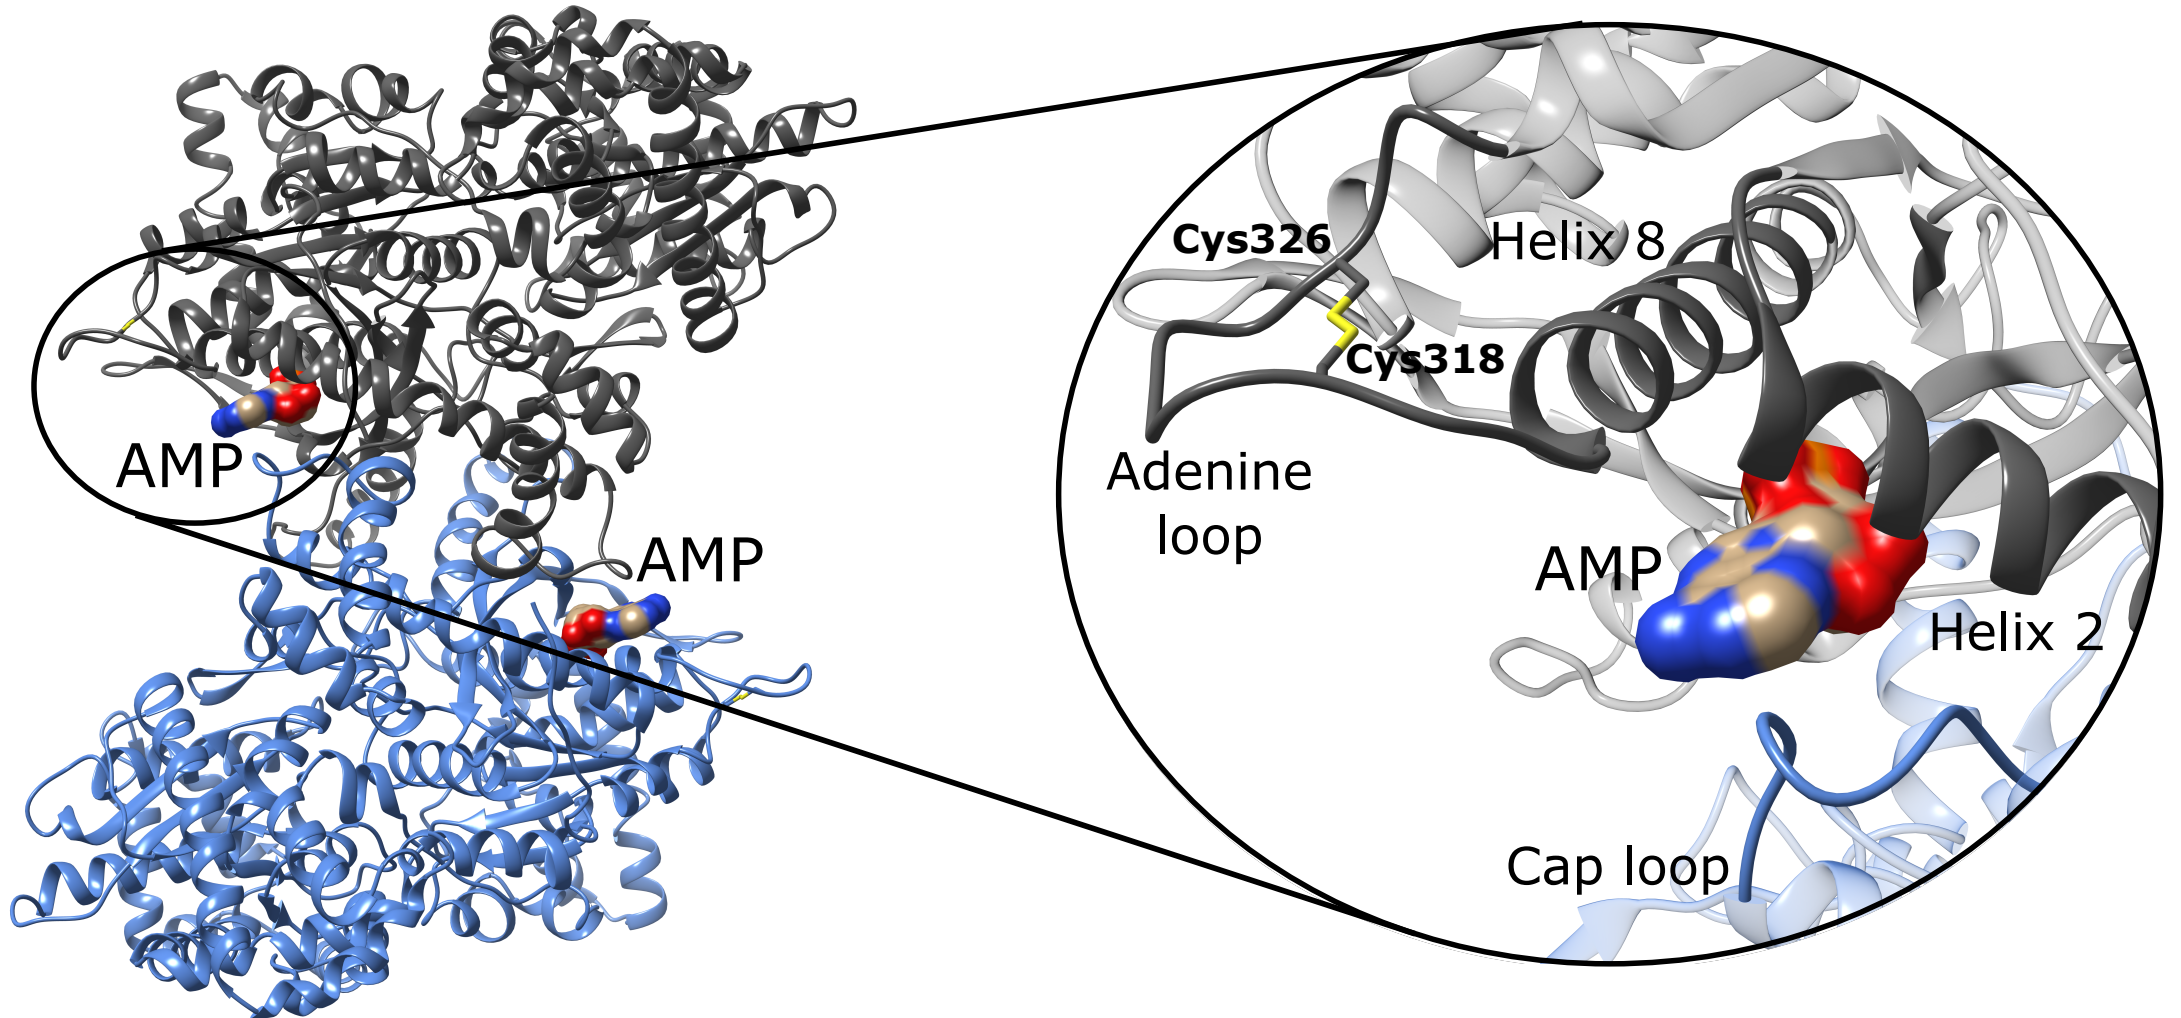

# Supplementary Figure 3

## RMS Fluctuation

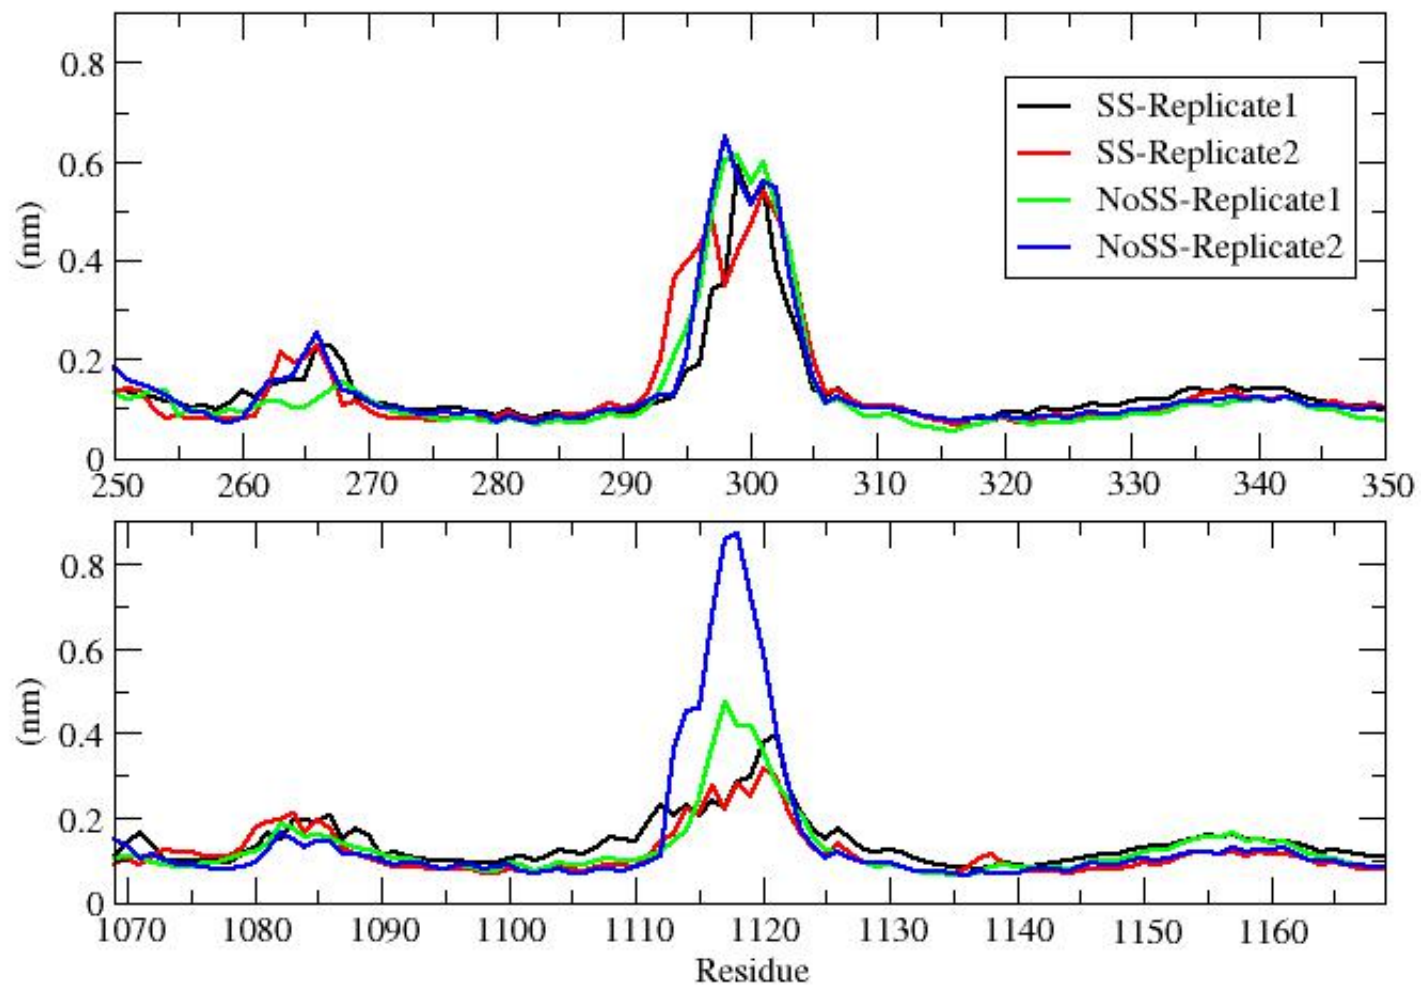

Supplement: 10.1074_M116.757062_jbc.M116.757062-2.pdf [file 10.1074_M116.757062_jbc.M116.757062-2.pdf]
